# Supplementary material for: Regenbogenfamilien begleiten und stärken
Source: Springer Nature journal article supplement (doi:10.1007/s43877-021-0141-3), 2021-11-01
Supplement: MOESM1 [file 19849970]

## Literatur

### zum Beitrag „Regenbogenfamilien begleiten und stärken“ von Michaela Herbertz-Floßdorf

HebammenWissen (2) 4/2021, S. 22-26

Allgemeine Informationen zum Themenfeld Regenbogenfamilie der Bundeszentrale für politische Bildung (22.09.21):  
<https://www.bpb.de/gesellschaft/gender/homosexualitaet/269064/regenbogenfamilien>

Buschner, A., Bergold, P.: Regenbogenfamilien in Deutschland. In: Bergold, P./Buschner, A./Mayer-Lewis, B./Mühling, T. (Hrsg.): Familien mit multipler Elternschaft. Entstehungszusammenhänge, Herausforderungen und Potenziale. Opladen, Berlin & Toronto: Verlag Barbara Budrich, S. 143-172, 2017.

Buschner, A., Bergold, P.: Die Auswirkungen von Diskriminierungserfahrungen und familiären Schutzfaktoren auf die psychische Anpassung von Kindern in lesbischen Stieffamilien. In: Lessenich, S. (Hrsg.) 2017: Geschlossene Gesellschaften. Verhandlungen des 38. Kongresses der Deutschen Gesellschaft für Soziologie in Bamberg 2016.

Frohn, D., Herbertz-Floßdorf, M., Wirth, T.: Wir sind Eltern! Eine Studie zur Lebenssituation von Kölner Regenbogenfamilien. Köln, 2011

Funcke, D./Thorn, P. (Hrsg.): Die gleichgeschlechtliche Familie mit Kindern. Interdisziplinäre Beiträge zu einer neuen Lebensform. Bielefeld, Transcript, 2010.  
Gerlach, Stephanie.: Regenbogenfamilien – Ein Handbuch. Berlin, Querverlag, 2010.  
Haag, Christian: Zum Kinderwunsch homosexueller Männer und Frauen. In G.Mai, T. Eichinger & C. Bozzaro (Hrsg.). Kinderwunsch und Reproduktionsmedizin. Ethische Herausforderungen der technisierten Fortpflanzung (1.Aufl., S. 400 – 425). Freiburg: Karl Alber, 2013.

Herbertz-Floßdorf, Michaela: Die heiraten und kriegen Kinder. Die meinen das ernst. Lesbische Eltern in NRW. Eine Expertise zur Situation und Bedarfen von lesbischen Eltern in NRW, LAG Lesben in NRW e.V., 2010. (<https://lesben.nrw/wp-content/uploads/2014/12/Expertise-lesbische-Eltern-in-NRW1.pdf>) (Stand 22.09.21)

Jansen, Elke: Wie geht es Kindern in Regenbogenfamilien? Ergebnisse der ersten repräsentativen wissenschaftlichen Studie in Deutschland über Kinder in Regenbogenfamilien. 2009 <https://www.lsvd.de/en/ct/817-Wie-geht-es-Kindern-in-Regenbogenfamilien> (Stand 21.09.21)

Jespersen, Andy: Gleichgeschlechtliche Paare als Pflegeeltern. Zentrum für Planung und Evaluation Sozialer Dienste, ZPE-Schriftenreihe Nr.37, Universität Siegen, 2014

Klapeer, Christine M.: Vielfalt ist nicht genug! Heteronormativität als herrschafts- und machtkritisches Konzept zur Intervention in gesellschaftliche Ungleichheiten. In: Schmidt, Friederike; Schondelmayer, Ann-Christin; Schröder, Ute B.: Selbstbestimmung und Anerkennung sexueller und geschlechtlicher Vielfalt – Lebenswirklichkeiten, Forschungsergebnisse und Bildungsbausteine. Wiesbaden: Springer VS 2015.

Klocke, Ulrich: Akzeptanz sexueller Vielfalt an Berliner Schulen. Eine Befragung zu Verhalten, Einstellungen und Wissen zu LSBT und deren Einflussvariablen. 2012 [https://www.psychologie.hu-berlin.de/de/prof/org/download/klocke2012\\_1](https://www.psychologie.hu-berlin.de/de/prof/org/download/klocke2012_1) (Stand 18.11.2020).

Krüger-Lebus, Susanne, Rauschfleisch, Udo: Zufriedenheit von Frauen in gleichgeschlechtlichen Partnerschaften mit und ohne Kinder, in: System Familie 12 (1999), S.74-79.

Lenz, Inge, Sabisch Katja, Wrzesinski, Marcel. Queer in NRW – Forschungsstand zu Lebenslagen und Sozialstruktur. In: Anders und gleich in NRW – Gleichstellung und Akzeptanz sexueller und geschlechtlicher Vielfalt Forschungsstand, Tagungsdokumentation, Praxisprojekte, Netzwerk Frauen und Geschlechterforschung NRW: Essen: 2012.

Rauchfleisch, Udo: Gleichgeschlechtliche Paare mit Kinder – Regenbogenfamilien. 2001 zuletzt überarbeitet 2015. <https://www.familienhandbuch.de/familie-leben/familienformen/elternschaft/gleichgeschlechtlichepaaremitkindernregenbogenf.php> (Stand 21.09.21)

Rupp, Marina (Hrsg.): Die Lebenssituation von Kindern in gleichgeschlechtlichen Lebenspartnerschaften. Bundesanzeiger Verlag, Köln, 2009.

Rupp, M., Bergold, P., Dürnberger, A.: Kinder in gleichgeschlechtlichen Paarbeziehungen, in: BDP, Psychologie Gesellschaft und Politik, 2009.

Schmincke, Imke (2017): Vielfalt war gestern? Familienbilder und sexuelle Identität im aktuellen gesellschaftlichen Diskurs. In: Familien- und Sozialverein des LSVD (Hrsg.): Dokumentation der Fachtagung „Regenbogenfamilien bewegen! Beratung zukunftsträchtig gestalten“. Köln. [https://blog.lsvd.de/wp-content/uploads/2017/05/2017\\_05\\_12-Vielfalt-war-gestern\\_Familienbilder-und-sexuelle-Identit%C3%A4t-im-aktuellen-Vortrag-Imke-Schmincke-Fachtag-Regenbogenfamilien.pdf](https://blog.lsvd.de/wp-content/uploads/2017/05/2017_05_12-Vielfalt-war-gestern_Familienbilder-und-sexuelle-Identit%C3%A4t-im-aktuellen-Vortrag-Imke-Schmincke-Fachtag-Regenbogenfamilien.pdf) (Stand 18.09.21)
