# Supplementary material for: Regenbogenfamilien begleiten und stärken
Source: Springer Nature journal article supplement (doi:10.1007/s43877-021-0141-3), 2021-11-01
Supplement: MOESM2 [file 19849970]

## Begriffe

### zum Beitrag „Regenbogenfamilien begleiten und stärken“ von Michaela Herbertz-Floßdorf

HebammenWissen (2) 4/2021, S. 22-26

#### **Coming-out (engl. aus der Kammer herauskommen)**

Coming-out bezeichnet einen Prozess, in dem Menschen feststellen, dass sie lesbisch, schwul, bisexuell, pansexuell, asexuell oder transident sind, und sie diese Information öffentlich machen. Coming-out stellt kein einmaliges Ereignis dar, sondern findet in jeder Lebenssituation statt, in der es zu neuen Begegnungen kommt, denn die meisten Menschen begegnen einander mit der Annahme, dass sie heterosexuell und in ihrem biologischen Geschlecht (cis-geschlechtlich) leben. Homosexualität und Transidentität werden nur sehr selten mitgedacht, deshalb müssen Lesben, Schwule und Transidente sich immer wieder outen, weil sie sonst nicht als der Mensch gesehen werden, der sie sind.

#### **Gender\_Gap/Gender-Star \***

Der Unterstrich hat sich statt des Binnen-I (LehrerInnen) und des Schrägstriches (Lehrer/-innen) etabliert. Der Unterstrich zeigt auf, dass neben weiblichen und männlichen weitere Geschlechtsidentitäten, wie z.B. trans- oder intergeschlechtliche, existieren. Die gleiche Funktion wie der Unterstrich erfüllen das Sternchen\* und der Doppelpunkt.

#### **Geschlechtsidentität**

Geschlechtsidentität beinhaltet das Empfinden bzgl. des eigenen Geschlechts, dem sich ein Individuum zugehörig fühlt und das bei den meisten Menschen mit den körperlichen Geschlechtsmerkmalen übereinstimmt. Oft wird von zwei binären Geschlechtervarianten ausgegangen (weiblich/männlich), dabei werden intergeschlechtliche, transgender und transidente Menschen ausgeschlossen. 2011 verabschiedete der Menschenrechtsrat der UNO eine Resolution, wonach niemand wegen der Geschlechtsidentität (Gender Identity) verfolgt und diskriminiert werden darf. Das Recht auf die individuelle Geschlechtsidentität ist also ein Menschenrecht.

#### **Cisidentität**

Cisident (aus der lateinischen Vorsilbe cis- = „diesseits“ und dem englischen gender = „Geschlecht“ zusammengesetzt) ist das Gegenteil von Trans\*identität, bezeichnet also Menschen, deren Geschlechtsidentität mit ihrem körperlichen Geschlecht übereinstimmt.

#### **Transidentität**

Als transident werden Menschen bezeichnet, deren Geschlechtsempfinden oder deren soziales Geschlecht ein anderes ist als ihr biologisches Geschlecht. Beispielsweise ist dies ein Mensch, dem bei der Geburt das männliche Geschlecht zugewiesen wurde, der sich aber als Mädchen empfindet und auch als Mädchen leben möchte.

#### **Inter\*/Intergeschlechtlichkeit**

Inter\* bezeichnet Menschen, deren angeborene Merkmale weder ausschließlich „männlich“ noch ausschließlich „weiblich“ sind. Die Merkmale können gleichzeitig typisch für diese beiden oder nicht eindeutig für eines von diesen Geschlechtern sein. Das kann sich in den sekundären Geschlechtsmerkmalen (z.B. Muskelmasse, Haarverteilung, Brüste und Statur) zeigen oder in den primären Geschlechtsorganen (Fortpflanzungsorgane und Genitalien) und/oder in chromosomalen Strukturen und Hormonen.

## **Heteronormativität**

Als Heteronormativität wird die für natürlich gehaltene, ausschließliche binäre Geschlechtereinteilung (in Mann und Frau) bezeichnet. Es wird davon ausgegangen, dass Heterosexualität die Norm sei und ausschließlich, naturgegeben und unveränderbar sei. Heterosexualität wird darüber stark privilegiert und andere Formen werden diskriminiert.

## **Homophobie/Homonegativität/Homofeindlichkeit**

Dieser Begriff umschreibt alle negativen Einstellungen gegenüber Lesben, Schwulen und Bisexuellen, die sich in Vorurteilen und Abwertung, der Befürwortung von Diskriminierung, bis hin zur eigenen Diskriminierung oder Gewaltausübung äußern können. Auch wenn der Begriff „Phobie“ auf Angst als Ursache von feindseligen Einstellungen gegenüber homosexuellen Menschen verweist, hat Homophobie keine Gemeinsamkeiten mit einer klassischen Angststörung wie z.B. Spinnen-Phobie oder Klaustrophobie. Daher wird von Psychologen\* innen befürwortet eher von Homonegativität zu sprechen.

Als Ursache für Abwehr und Hass gilt deshalb vor allem die Wahrnehmung, dass Lesben und Schwule durch ihren Lebensentwurf von der sozialen Norm eines polaren und dualen, ausschließlich auf Heterosexualität ausgerichteten Geschlechtersystems abweichen. Die gesellschaftliche Abwertung von Lesben und Schwulen wird zudem durch Vorurteile legitimiert, die durch eine lange Geschichte gesellschaftlicher und staatlicher Verfolgung (hier insbesondere die NS-Zeit und die Strafverfolgung in der Nachkriegszeit) gestützt wurden. In vielen Gesellschaften wurde und wird Homosexualität immer noch als „krankhaft“ und „unnormale“ bekämpft. Dies führt dazu, dass Menschen Angst haben, ihre eigene Homosexualität zu entdecken oder für homosexuell gehalten zu werden. Hier spricht man von „internalisierter Homophobie“ bzw. „Homonegativität“, die häufig Grundlage für ein schwieriges Coming-out ist.

## **LSBTT\*IQ**

ist eine Abkürzung und steht für Lesben, Schwule, Bisexuelle, Transidente, Transgender, Intergeschlechtliche und Queer

## **Paragraf 175**

Der § 175 des deutschen Strafgesetzbuches (§ 175 StGB-Deutschland) existierte vom 1. Januar 1872 (Inkrafttreten des Reichsstrafgesetzbuches) bis zum 11. Juni 1994. Er stellte sexuelle Handlungen zwischen Personen männlichen Geschlechts unter Strafe. Bis 1969 bestrafte er auch die „widernatürliche Unzucht mit Tieren“ (ab 1935 nach § 175b ausgelagert). Insgesamt wurden etwa 140.000 Männer nach den verschiedenen Fassungen des § 175 in der BRD verurteilt.

## **Regenbogenfamilie**

Dies sind Familien, in denen sich mindestens ein Elternteil eine lesbische, schwule oder trans\*-Identität zuschreibt.

## **Sexuelle Identität (heterosexuell, homosexuell (schwul und lesbisch), bisexuell, pansexuell, asexuell):**

Das Konzept der sexuellen Identität bezeichnet das emotionale und sexuelle Interesse einer Person an anderen Personen bzw. potenziellen Partner\*innen in Abhängigkeit von dem Geschlecht der Personen. Es können drei Formen der sexuellen Identität unterschieden werden: Heterosexualität, Bisexualität und Homosexualität. Die Übergänge zwischen den drei Formen sind durchaus fließend und keine starren Kategorien. Die Bezeichnung der eigenen Identität wird immer von einer Person selbst bestimmt und ist keine Zuschreibung von außen.

## **Homosexualität (griech.: homoios = gleich)**

Als homosexuell wird Begehren bzw. emotionale, romantische und sexuelle Verbindung bezeichnet, das bzw. die sich auf Personen des gleichen Geschlechts richtet. Bei Frauen wird auch der Begriff lesbisch und bei Männern der Begriff schwul verwendet.

**Bisexualität (lat. Vorsilbe bi- für zwei)**

Als bisexuell wird Begehren bzw. emotionale und sexuelle Verbindung bezeichnet, das bzw. die sich auf Personen des gleichen und des anderen Geschlechts richtet. Bisexualität gilt, wie Homosexualität und Heterosexualität, als sexuelle Identität.

**Heterosexualität (griech.: heteros = der andere, lat.: sexus = Geschlecht)**

Als heterosexuell wird Begehren bzw. emotionale, romantische und sexuelle Verbindung bezeichnet, das bzw. die sich auf Personen des anderen Geschlechts richtet.

**Samenspenderregister**

Seit dem 1.1.2018 gibt es in Deutschland ein Samenspenderregistergesetz, das am 1.7.2018 in Kraft getreten ist und in das auch Spender von ausländischen Samenbanken verpflichtend eingetragen werden müssen. In das Samenspenderregister werden personenbezogene Daten von Spendern und Empfängerinnen einer Samenspende aufgenommen (Name, Geburtstag, Geburtsort, Staatsangehörigkeit, Anschrift). Auch kann der Spender freiwillig ergänzende Angaben über seine Person für das Kind hinterlassen (z.B. Aussehen, Bildungsstand, Beweggründe für die Spende). Die Angaben des Spenders werden 110 Jahre lang gespeichert. Der Samenspender wird vier Wochen vor Auskunftserteilung über die Auskunftsanfrage informiert.

(<https://www.bundesgesundheitsministerium.de/service/begriffe-von-a-z/s/samenspenderregister/faqs-samenspenderregistergesetz.html>).

**Stiefkindadoption**

Ist die Adoption des leiblichen Kindes der/des Partner\*in in der eingetragenen Lebenspartnerschaft oder gleichgeschlechtlichen Ehe/Partnerschaft. Durch die Stiefkindadoption können gleichgeschlechtliche Partner\*innen beide rechtliche Eltern eines Kindes werden. Heterosexuelle Paare müssen bei Familiengründung mit Spendersamen keine Stiefkindadoption durchlaufen, sie sind mit der Geburt des Kindes auch rechtliche Eltern des Kindes.

**Queer**

Der Begriff „queer“ kommt aus dem Englischen und bedeutet „seltsam, verrückt, abweichend“. Der Begriff ist ein Sinnbild für alles und alle, die von der Norm abweichen. Die Idee hinter „queer“ ist, dass der Zwang zu heteronormativem Verhalten und Denken sowie die binäre Geschlechterordnung hinterfragt und aufgelöst wird. Jede und jeder sollte so leben können, wie sie oder er leben möchte und glücklich ist. Der wissenschaftliche Begriff „queer“ wurde vor allem von der Wissenschaftlerin Judith Butler (USA) durch ihre Veröffentlichung der Queer-Theorie Anfang der 90er Jahren geprägt.
